# Supplementary material for: Association of Fish Oil Supplementation with Risk of Coronary Heart Disease in Individuals with Diabetes and Prediabetes: A Prospective Study in the UK Biobank
Source: MDPI journal article supplement (doi:10.3390/nu15143176), 2023-07-17
Supplement: s1 [file s1]

**Association of Fish Oil Supplementation with Risk of Coronary Heart Disease in Diabetes and Prediabetes Individuals: A Prospective Study**

Xiaohui Liu, et al.

**Figure S1.** Flow chart of study participants .....2

**Table S1.**  $\beta$  coefficients of fish oil supplement use for blood indicators from general linear regression analysis in the UK Biobank in participants with prediabetes and diabetes. ....3

**Table S2.** Diet component definitions used in the UK Biobank study. ....4

**Table S3.** Codes used in the UK Biobank to identify dementia cases and other relevant diseases. ....5

**Table S4.**  $\beta$  coefficients of fish oil use for blood indicators from general linear regression analysis in the UK Biobank in participants with prediabetes and diabetes .....6

**Table S5.** Sensitivity analyses for the HRs (95% CIs) of CHD according to fish oil supplement use among participants with prediabetes. ....7

**Table S6.** Sensitivity analyses for the HRs (95% CIs) of CHD according to fish oil supplement use among participants with diabetes. ....8

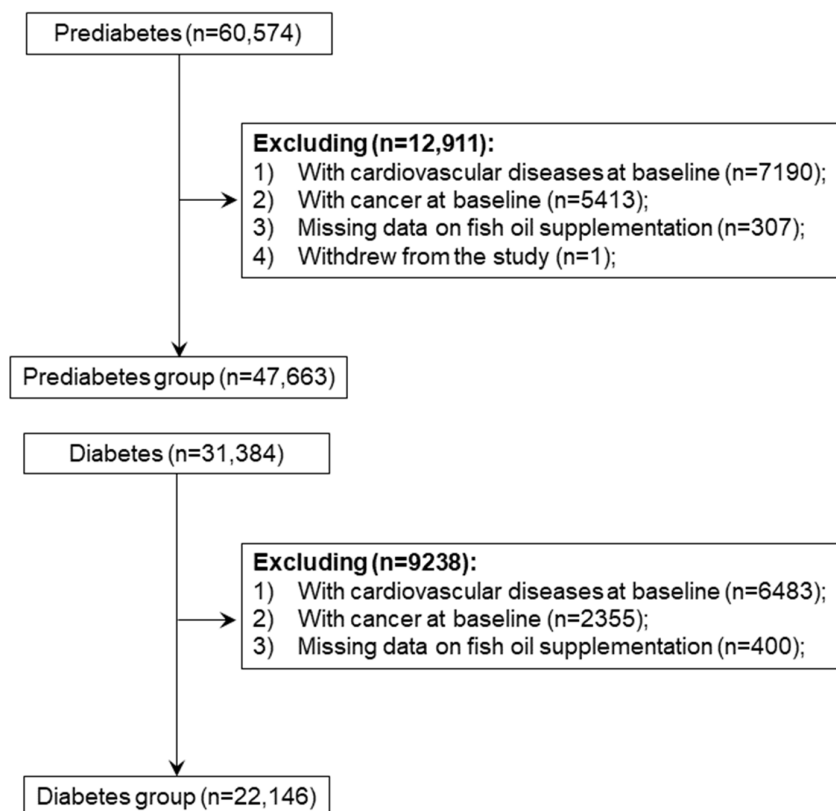

**Figure S1.** Flow chart of study participants

**Table S1.**  $\beta$  coefficients of fish oil supplement use for blood indicators from general linear regression analysis in the UK Biobank in participants with prediabetes and diabetes.

|                                     | <b>Baseline</b> | <b>First repeat assessment (2012-2013)</b> | <b>Imaging visit (2014+)</b> |
|-------------------------------------|-----------------|--------------------------------------------|------------------------------|
| <b>Prediabetes</b>                  |                 |                                            |                              |
| No of participants                  | 47,663          | 1705                                       | 3703                         |
| Baseline                            | 1.00            | 0.61                                       | 0.49                         |
| First repeat assessment (2012-2013) |                 | 1.00                                       | 0.64                         |
| Imaging visit (2014+)               |                 |                                            | 1.00                         |
| <b>Diabetes</b>                     |                 |                                            |                              |
| No of participants                  | 22,146          | 738                                        | 1416                         |
| Baseline                            | 1.00            | 0.60                                       | 0.44                         |
| First repeat assessment (2012-2013) |                 | 1.00                                       | 0.68                         |
| Imaging visit (2014+)               |                 |                                            | 1.00                         |

**Table S2.** Diet component definitions used in the UK Biobank study.

| Components                | Intake goal      | Field IDs                                                                                                                                                                                                       | Amount per serving                                                                |
|---------------------------|------------------|-----------------------------------------------------------------------------------------------------------------------------------------------------------------------------------------------------------------|-----------------------------------------------------------------------------------|
| Fruit                     | 3 servings/day   | 1309 (pieces fresh fruit/day) 1319 (pieces dried fruit/day)                                                                                                                                                     | 1309 – 1 piece<br>1319 – 5 pieces                                                 |
| Vegetable                 | 3 servings/day   | 1289 (tablespoons cooked vegetables/day)<br>1299 (salad/raw vegetables/day)                                                                                                                                     | 3 heaped tablespoons                                                              |
| Whole grains              | 3 servings/day   | 1438, 1448 (whole meal/wholegrain bread slices/week)<br>1458, 1468 (bran/oat/muesli cereal bowls/week)                                                                                                          | 1438/1448 – 1 slice/day<br>1458/1468 – 1 bowl/day                                 |
| Fish                      | ≥2 servings/week | 1329 (oily fish/week)<br>1339 (non-oily fish/week)                                                                                                                                                              | Once/week                                                                         |
| Dairy                     | 2 servings/day   | 1408 (cheese/week)<br>1418 (milk type)                                                                                                                                                                          | 1408 – 1 piece/day<br>1418 – 1 glass/day if consumption of any type of milk       |
| Vegetable oils            | 2 servings/day   | 1428 (Flora Pro-Active/Benecol spread)<br>2654 (Flora Pro-Active/Benecol, soft margarine -, olive oil based -, polyunsaturated/sunflower oil based -, other low/reduced fat spread)<br>1438 (bread slices/week) | 1 serving/day if in combination with eating at least 2 slices of bread (ID 1438)  |
| Refined grains            | ≤2 servings/day  | 1438, 1448 (white, brown, other bread slices/week)<br>1458, 1468 (biscuit, other cereals/week)                                                                                                                  | 1438/1448 – 1 slice/day<br>1458/1468 – 1 bowl/day                                 |
| Processed meats           | ≤1 serving/week  | 1349 (processed meat/week or daily) 3680 (age when last ate meat)                                                                                                                                               | 1349 – 1 piece/day<br>3680 – 0 pieces/day if indicated having never eaten meat    |
| Unprocessed meats         | ≤2 serving/wk.   | 1359 (poultry/week or day)<br>1369 (beef/week or day)<br>1379 (lamb or mutton/week or day) 1389 (pork/week or day)<br>3680 (age when last ate meat)                                                             | 1359-1389 – once/week<br>3680 – 0 pieces/day if indicated having never eaten meat |
| Sugar-sweetened beverages | Don't drink      | 6144 (never consumes drinks containing sugar)                                                                                                                                                                   | 0 servings                                                                        |

Field IDs and serving sizes used per diet component in UK Biobank with available data from the general baseline questionnaire. If participants achieved the intake goal they were given 1 point for the diet component.

The total healthy diet score was the sum of all the diet component scores and ranged from 0 to 10.

**Table S3.** Codes used in the UK Biobank to identify dementia cases and other relevant diseases.

| <b>Outcomes</b>              | <b>ICD-9</b>            | <b>ICD-10</b>              | <b>OPCS-4</b>          | <b>Self-reported fields</b>                                                     | <b>Other</b>                                           |
|------------------------------|-------------------------|----------------------------|------------------------|---------------------------------------------------------------------------------|--------------------------------------------------------|
| Coronary Heart Disease (CHD) | 410, 411, 412, 413, 414 | I20-25                     | K40-K46, K49, K50, K75 | 6150 (1), 3894, 20004 (1070,1095,1523)                                          |                                                        |
| Diabetes                     | 250                     | E10-E14                    | —                      | 2443 (1), 2976, 6153 (3), 6177 (3), 20002 (1220, 1222, 1223)                    | HbA1c $\geq$ 6.5% (48 mmol/mol)                        |
| Prediabetes                  | 250 (without diabetes)  | E10-E14 (without diabetes) | —                      | 2443 (1), 2976, 6153 (3), 6177 (3), 20002 (1220, 1222, 1223) (without diabetes) | 5.7% [39 mmol/mol]<br>$\leq$ HbA1c <6.5% [48 mmol/mol] |

**Table S4.**  $\beta$  coefficients of fish oil use for blood indicators from general linear regression analysis in the UK Biobank in participants with prediabetes and diabetes

| Blood indicator   | Prediabetes |       |                  | Diabetes |       |              |
|-------------------|-------------|-------|------------------|----------|-------|--------------|
|                   | $\beta$     | SE    | P value          | $\beta$  | SE    | P value      |
| Glucose           | 0.007       | 0.009 | 0.426            | -0.075   | 0.059 | 0.204        |
| HbA1c             | -0.028      | 0.020 | 0.157            | -0.683   | 0.234 | <b>0.004</b> |
| CRP*              | -0.027      | 0.007 | <b>&lt;0.001</b> | -0.029   | 0.011 | <b>0.008</b> |
| TG                | -0.001      | 0.011 | 0.952            | 0.054    | 0.020 | <b>0.007</b> |
| TC                | 0.053       | 0.011 | <b>&lt;0.001</b> | 0.050    | 0.016 | <b>0.002</b> |
| HDL-C             | 0.009       | 0.003 | <b>0.009</b>     | 0.010    | 0.005 | <b>0.037</b> |
| Large HDL-C       | 0.002       | 0.003 | 0.575            | 0.004    | 0.004 | 0.300        |
| Medium HDL-C      | 0.001       | 0.002 | 0.597            | 0.005    | 0.003 | 0.110        |
| Small HDL-C       | 0.002       | 0.001 | 0.155            | 0.001    | 0.002 | 0.752        |
| Very large HDL-C  | 0.001       | 0.001 | 0.317            | 0.000    | 0.001 | 0.836        |
| IDL-C             | 0.010       | 0.004 | <b>0.014</b>     | -0.006   | 0.006 | 0.276        |
| LDL-C             | 0.039       | 0.009 | <b>&lt;0.001</b> | 0.028    | 0.012 | <b>0.021</b> |
| Large LDL-C       | 0.019       | 0.006 | <b>0.001</b>     | -0.011   | 0.008 | 0.168        |
| Medium LDL-C      | 0.007       | 0.002 | <b>0.005</b>     | -0.006   | 0.004 | 0.083        |
| Small LDL-C       | 0.002       | 0.001 | <b>0.020</b>     | -0.003   | 0.001 | <b>0.032</b> |
| VLDL-C            | 0.007       | 0.005 | 0.150            | -0.012   | 0.007 | 0.105        |
| Large VLDL-C      | 0.001       | 0.001 | 0.348            | -0.001   | 0.001 | 0.386        |
| Medium VLDL-C     | 0.008       | 0.004 | 0.061            | -0.006   | 0.006 | 0.388        |
| Small VLDL-C      | 0.003       | 0.001 | <b>0.011</b>     | -0.002   | 0.001 | 0.117        |
| Very large VLDL-C | 0.000       | 0.001 | 0.917            | -0.001   | 0.001 | 0.191        |
| Very small VLDL-C | 0.003       | 0.001 | <b>0.008</b>     | -0.001   | 0.001 | 0.292        |
| ApoA              | 0.003       | 0.003 | 0.310            | 0.008    | 0.004 | <b>0.036</b> |
| ApoB              | 0.013       | 0.002 | <b>&lt;0.001</b> | 0.009    | 0.004 | <b>0.013</b> |
| IGF-1             | 0.392       | 0.060 | <b>&lt;0.001</b> | 0.220    | 0.105 | <b>0.037</b> |

CRP, C-reactive protein; TG, triglyceride; TC, total cholesterol; HDL, high-density lipoprotein; LDL, low-density lipoprotein

\*log (units+1) of CRP values were used.

Results were adjusted for age (continues), sex (male or female), race (white or non-white), assessment centers (22 categories), BMI (in kg/m<sup>2</sup>; <18.5, 18.5 to 25, 25 to 30, 30 to 35,  $\geq 35$ , or missing), Townsend deprivation index (tertiles), household income (<£18,000, £18,000-£30,999, £31,000-£51,999, £52,000-£100,000, >£100,000, or missing), smoking status (never, former, current, or missing), alcohol drinking (never or special occasions only, 1 or 2 times/week, 3 or 4 times/week,  $\geq 5$  times/week, or missing), physical activity (in MET-h/wk; tertiles), history of hypertension (yes or no), history of high cholesterol (yes or no), family history of cardiovascular diseases (yes or no), family history of diabetes (yes or no), vitamin supplement use (yes or no), mineral supplement use (yes or no), aspirin use (yes or no), and healthy diet score (tertiles). Further adjusted diabetes duration for diabetic patients (years; <5, 5 to 10,  $\geq 10$ ).

**Table S5.** Sensitivity analyses for the HRs (95% CIs) of CHD according to fish oil supplement use among participants with prediabetes.

|                                                                       | Fish oil non-users | Fish oil users   | P value |
|-----------------------------------------------------------------------|--------------------|------------------|---------|
| <b>Further adjusting for lipid-lowering drugs</b>                     |                    |                  |         |
| No of participants                                                    | 31,727 (66.6)      | 15,936 (33.4)    |         |
| No of cases (%)                                                       | 2871 (9.1)         | 1433 (9.0)       |         |
| Age- and sex-adjusted HR (95% CI)                                     | 1 [Reference]      | 0.91 (0.85-0.97) | 0.002   |
| Multivariable-adjusted HR (95% CI)                                    | 1 [Reference]      | 0.91 (0.85-0.98) | 0.004   |
| <b>Further adjusting for CRP</b>                                      |                    |                  |         |
| No of participants                                                    | 30,169 (66.6)      | 15,140 (33.4)    |         |
| No of cases (%)                                                       | 2719 (9.0)         | 1366 (9.0)       |         |
| Age- and sex-adjusted HR (95% CI)                                     | 1 [Reference]      | 0.93 (0.87-1.00) | 0.038   |
| Multivariable-adjusted HR (95% CI)                                    | 1 [Reference]      | 0.92 (0.86-0.99) | 0.029   |
| <b>Further adjusting for sleep score</b>                              |                    |                  |         |
| No of participants                                                    | 31,727 (66.6)      | 15,936 (33.4)    |         |
| No of cases (%)                                                       | 2871 (9.1)         | 1433 (9.0)       |         |
| Age- and sex-adjusted HR (95% CI)                                     | 1 [Reference]      | 0.92 (0.86-0.98) | 0.007   |
| Multivariable-adjusted HR (95% CI)                                    | 1 [Reference]      | 0.91 (0.85-0.98) | 0.011   |
| <b>Excluding incident CHD within 2 years</b>                          |                    |                  |         |
| No of participants                                                    | 31,309 (66.6)      | 15,718 (33.4)    |         |
| No of cases (%)                                                       | 2453 (7.8)         | 1215 (7.7)       |         |
| Age- and sex-adjusted HR (95% CI)                                     | 1 [Reference]      | 0.91 (0.84-0.97) | 0.005   |
| Multivariable-adjusted HR (95% CI)                                    | 1 [Reference]      | 0.91 (0.85-0.99) | 0.019   |
| <b>Excluding participants who took other supplements</b>              |                    |                  |         |
| No of participants                                                    | 24,640 (79.1)      | 6529 (21.0)      |         |
| No of cases (%)                                                       | 2242 (9.1)         | 595 (9.1)        |         |
| Age- and sex-adjusted HR (95% CI)                                     | 1 [Reference]      | 0.90 (0.82-0.99) | 0.023   |
| Multivariable-adjusted HR (95% CI)                                    | 1 [Reference]      | 0.92 (0.84-1.01) | 0.080   |
| <b>Excluding participants with missing covariate data</b>             |                    |                  |         |
| No of participants                                                    | 21,032 (66.5)      | 10,586 (33.5)    |         |
| No of cases (%)                                                       | 1855 (8.8)         | 910 (8.6)        |         |
| Age- and sex-adjusted HR (95% CI)                                     | 1 [Reference]      | 0.89 (0.82-0.97) | 0.006   |
| Multivariable-adjusted HR (95% CI)                                    | 1 [Reference]      | 0.87 (0.80-0.95) | 0.002   |
| <b>Including participants with 5.6 mmol/L ≤ glucose ≤ 6.9 mmol/L)</b> |                    |                  |         |
| No of participants                                                    | 38,735 (67.0)      | 19,122 (33.1)    |         |
| No of cases (%)                                                       | 3479 (9.0)         | 1708 (8.9)       |         |
| Age- and sex-adjusted HR (95% CI)                                     | 1 [Reference]      | 0.90 (0.85-0.95) | <0.001  |
| Multivariable-adjusted HR (95% CI)                                    | 1 [Reference]      | 0.91 (0.85-0.97) | 0.003   |

CI, confidence interval; HR, hazard ratio.

The multivariate model was adjusted for age (continues), sex (male or female), race (white or non-white), assessment centers (22 categories), BMI (in kg/m<sup>2</sup>; <18.5, 18.5 to 25, 25 to 30, 30 to 35, ≥35, or missing),

Townsend deprivation index (tertiles), household income (<£18,000, £18,000-£30,999, £31,000-£51,999, £52,000-£100,000, >£100,000, or missing), smoking status (never, former, current, or missing), alcohol drinking (never or special occasions only, 1 or 2 times/week, 3 or 4 times/week,  $\geq 5$  times/week, or missing), physical activity (in MET-h/wk; tertiles), history of hypertension (yes or no), history of high cholesterol (yes or no), family history of cardiovascular diseases (yes or no), family history of diabetes (yes or no), vitamin supplement use (yes or no), mineral supplement use (yes or no), aspirin use (yes or no), and healthy diet score (tertiles).



**Table S6.** Sensitivity analyses for the HRs (95% CIs) of CHD according to fish oil supplement use among participants with diabetes.

|                                                           | Fish oil non-users | Fish oil users   | P value |
|-----------------------------------------------------------|--------------------|------------------|---------|
| <b>Further adjusting for lipid-lowering drugs</b>         |                    |                  |         |
| No of participants                                        | 15,836 (71.5)      | 6310 (28.5)      |         |
| No of cases (%)                                           | 2393 (15.1)        | 901 (14.3)       |         |
| Age- and sex-adjusted HR (95% CI)                         | 1 [Reference]      | 0.85 (0.79-0.92) | <0.001  |
| Multivariable-adjusted HR (95% CI)                        | 1 [Reference]      | 0.88 (0.81-0.95) | 0.002   |
| <b>Further adjusting for glucose-lowering drugs*</b>      |                    |                  |         |
| No of participants                                        | 15,836 (71.5)      | 6310 (28.5)      |         |
| No of cases (%)                                           | 2393 (15.1)        | 901 (14.3)       |         |
| Age- and sex-adjusted HR (95% CI)                         | 1 [Reference]      | 0.86 (0.80-0.93) | <0.001  |
| Multivariable-adjusted HR (95% CI)                        | 1 [Reference]      | 0.88 (0.81-0.95) | 0.002   |
| <b>Further adjusting for CRP</b>                          |                    |                  |         |
| No of participants                                        | 14,773 (71.3)      | 5941 (28.7)      |         |
| No of cases (%)                                           | 2247 (15.2)        | 850 (14.3)       |         |
| Age- and sex-adjusted HR (95% CI)                         | 1 [Reference]      | 0.86 (0.79-0.93) | <0.001  |
| Multivariable-adjusted HR (95% CI)                        | 1 [Reference]      | 0.88 (0.80-0.95) | 0.002   |
| <b>Further adjusting for sleep score</b>                  |                    |                  |         |
| No of participants                                        | 15,836 (71.5)      | 6310 (28.5)      |         |
| No of cases (%)                                           | 2393 (15.1)        | 901 (14.3)       |         |
| Age- and sex-adjusted HR (95% CI)                         | 1 [Reference]      | 0.86 (0.79-0.93) | <0.001  |
| Multivariable-adjusted HR (95% CI)                        | 1 [Reference]      | 0.87 (0.80-0.95) | 0.002   |
| <b>Excluding incident CHD within 2 years</b>              |                    |                  |         |
| No of participants                                        | 15,488 (71.5)      | 6179 (28.5)      |         |
| No of cases (%)                                           | 2045 (13.2)        | 770 (12.5)       |         |
| Age- and sex-adjusted HR (95% CI)                         | 1 [Reference]      | 0.86 (0.79-0.93) | <0.001  |
| Multivariable-adjusted HR (95% CI)                        | 1 [Reference]      | 0.87 (0.80-0.95) | 0.003   |
| <b>Excluding participants who took other supplements</b>  |                    |                  |         |
| No of participants                                        | 12,534 (82.1)      | 2733 (17.9)      |         |
| No of cases (%)                                           | 1902 (15.2)        | 394 (14.4)       |         |
| Age- and sex-adjusted HR (95% CI)                         | 1 [Reference]      | 0.83 (0.74-0.93) | 0.001   |
| Multivariable-adjusted HR (95% CI)                        | 1 [Reference]      | 0.86 (0.77-0.96) | 0.008   |
| <b>Excluding participants with missing covariate data</b> |                    |                  |         |
| No of participants                                        | 10,429 (71.3)      | 4206 (28.7)      |         |
| No of cases (%)                                           | 1504 (14.4)        | 608 (14.5)       |         |
| Age- and sex-adjusted HR (95% CI)                         | 1 [Reference]      | 0.91 (0.82-1.00) | 0.040   |
| Multivariable-adjusted HR (95% CI)                        | 1 [Reference]      | 0.92 (0.83-1.02) | 0.117   |
| <b>Excluding participants with type 1 diabetes</b>        |                    |                  |         |
| No of participants                                        | 15,602 (71.5)      | 6222 (28.5)      |         |
| No of cases (%)                                           | 2359 (15.1)        | 884 (14.2)       | <0.001  |
| Age- and sex-adjusted HR (95% CI)                         | 1 [Reference]      | 0.85 (0.78-0.92) |         |
| Multivariable-adjusted HR (95% CI)                        | 1 [Reference]      | 0.87 (0.80-0.95) | 0.001   |

\*Glucose-lowering drugs including oral and insulin.

CI, confidence interval; HR, hazard ratio.

The multivariate model was adjusted for age (continues), sex (male or female), race (white or non-white), assessment centers (22 categories), BMI (in kg/m<sup>2</sup>; <18.5, 18.5 to 25, 25 to 30, 30 to 35, ≥35, or missing), Townsend deprivation index (tertiles), household income (<£18,000, £18,000-£30,999, £31,000-£51,999, £52,000-£100,000, >£100,000, or missing), smoking status (never, former, current, or missing), alcohol drinking (never or special occasions only, 1 or 2 times/week, 3 or 4 times/week, ≥5 times/week, or missing), physical activity (in MET-h/wk; tertiles), history of hypertension (yes or no), history of high cholesterol (yes or no), family history of cardiovascular diseases (yes or no), family history of diabetes (yes or no), vitamin supplement use (yes or no), mineral supplement use (yes or no), aspirin use (yes or no), and healthy diet score (tertiles). Further adjusted diabetes duration for diabetic patients (years; <5, 5 to 10, ≥10).
